# Supplementary material for: Mining RNA‐seq data reveals the massive regulon of GcvB small RNA and its physiological significance in maintaining amino acid homeostasis in Escherichia coli
Source: PubMed Central journal article supplement — Mol Microbiol. 2021 Nov 9;117(1):160–78. doi: 10.1111/mmi.14814 (PMC9299463; doi:10.1111/mmi.14814), 2021-11-09
Supplement: MMI-117-160-s001.pdf [file MMI-117-160-s001.pdf]

## Supplementary Information

### **Mining RNA-seq data reveals the massive regulon of GcvB small RNA and its physiological significance in maintaining amino acid homeostasis in *Escherichia coli***

Masatoshi Miyakoshi, Haruna Okayama, Maxence Lejars, Takeshi Kanda, Yuki Tanaka, Kaori Itaya, Miki Okuno, Takehiko Itoh, Noritaka Iwai, Masaaki Wachi

#### **This supplement contains:**

Supplementary Figures S1 to S2

Supplementary Tables S1 to S8

Figure S1. Growth inhibition by dipeptides.

Figure S2. Transition of GcvB regulon depending on growth conditions.

Table S1. Genes repeatedly detected in the datasets of RIL-seq, CLASH, and MAPS.

Table S2. Comparative genome analysis of  $\Delta peps$  suppressor mutants.

Table S3. Bacterial strains used in this study.

Table S4. DNA oligonucleotides used in this study.

Table S5. Plasmids used in this study.

Table S6. Inserts of GcvB mutant plasmids.

Table S7. Details of GFP fusion plasmids.

Table S8. Inserts of GFP fusion plasmids.

Supplementary Figure S1

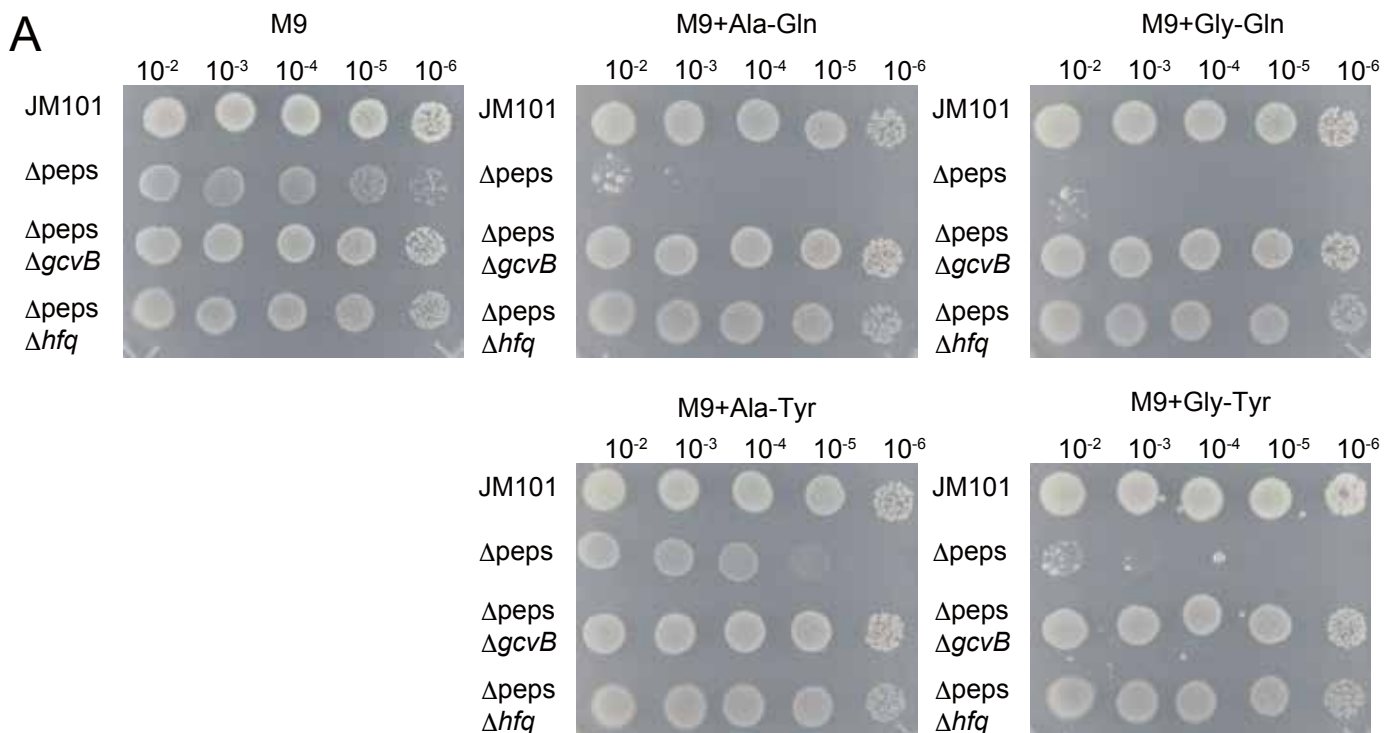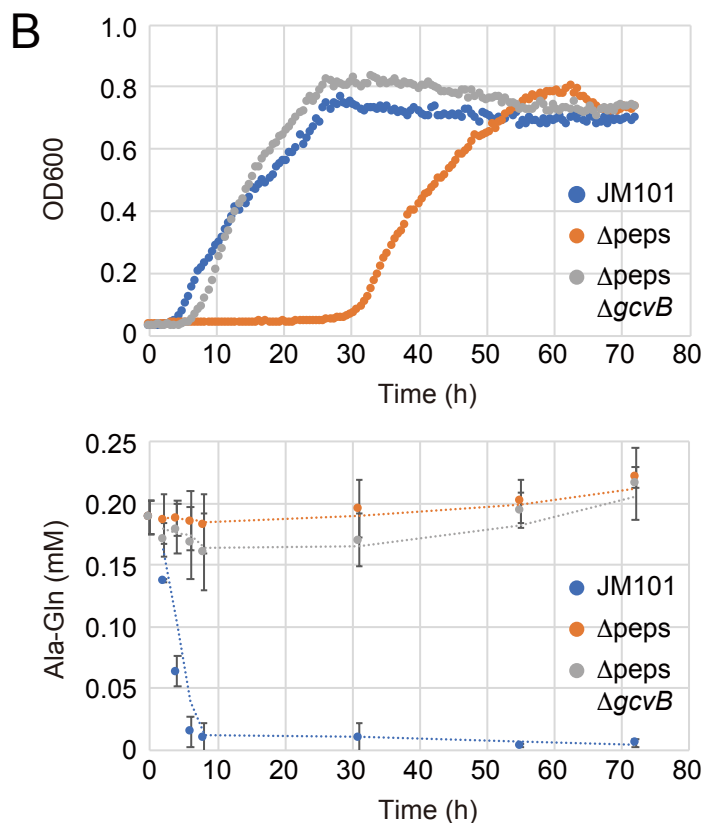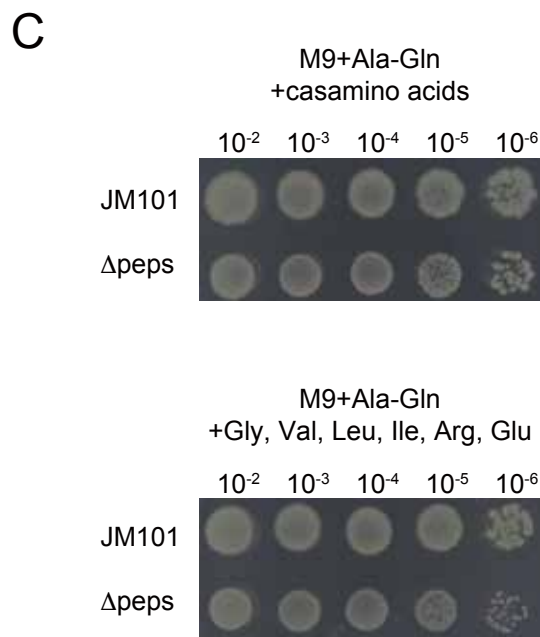

**Figure S1. Growth inhibition by dipeptides.** (A) Growth on M9 plates was compared among the wild-type JM101 strain,  $\Delta$ peps strain,  $\Delta$ peps $\Delta$ gcvB and  $\Delta$ peps $\Delta$ hfq. M9 plates were supplemented with 0.2 mM dipeptides as indicated. (B) Growth curve of JM101,  $\Delta$ peps, and  $\Delta$ peps $\Delta$ gcvB strains in M9 liquid medium and Ala-Gln concentration in the supernatant. (C) Growth of JM101 and  $\Delta$ peps strains on M9 plates supplemented with 1 mg/mL casamino acids (upper panel) and six amino acids (100  $\mu$ g/mL each, lower panel) in addition to 0.2 mM Ala-Gln. The plates were incubated at 30°C for two days.

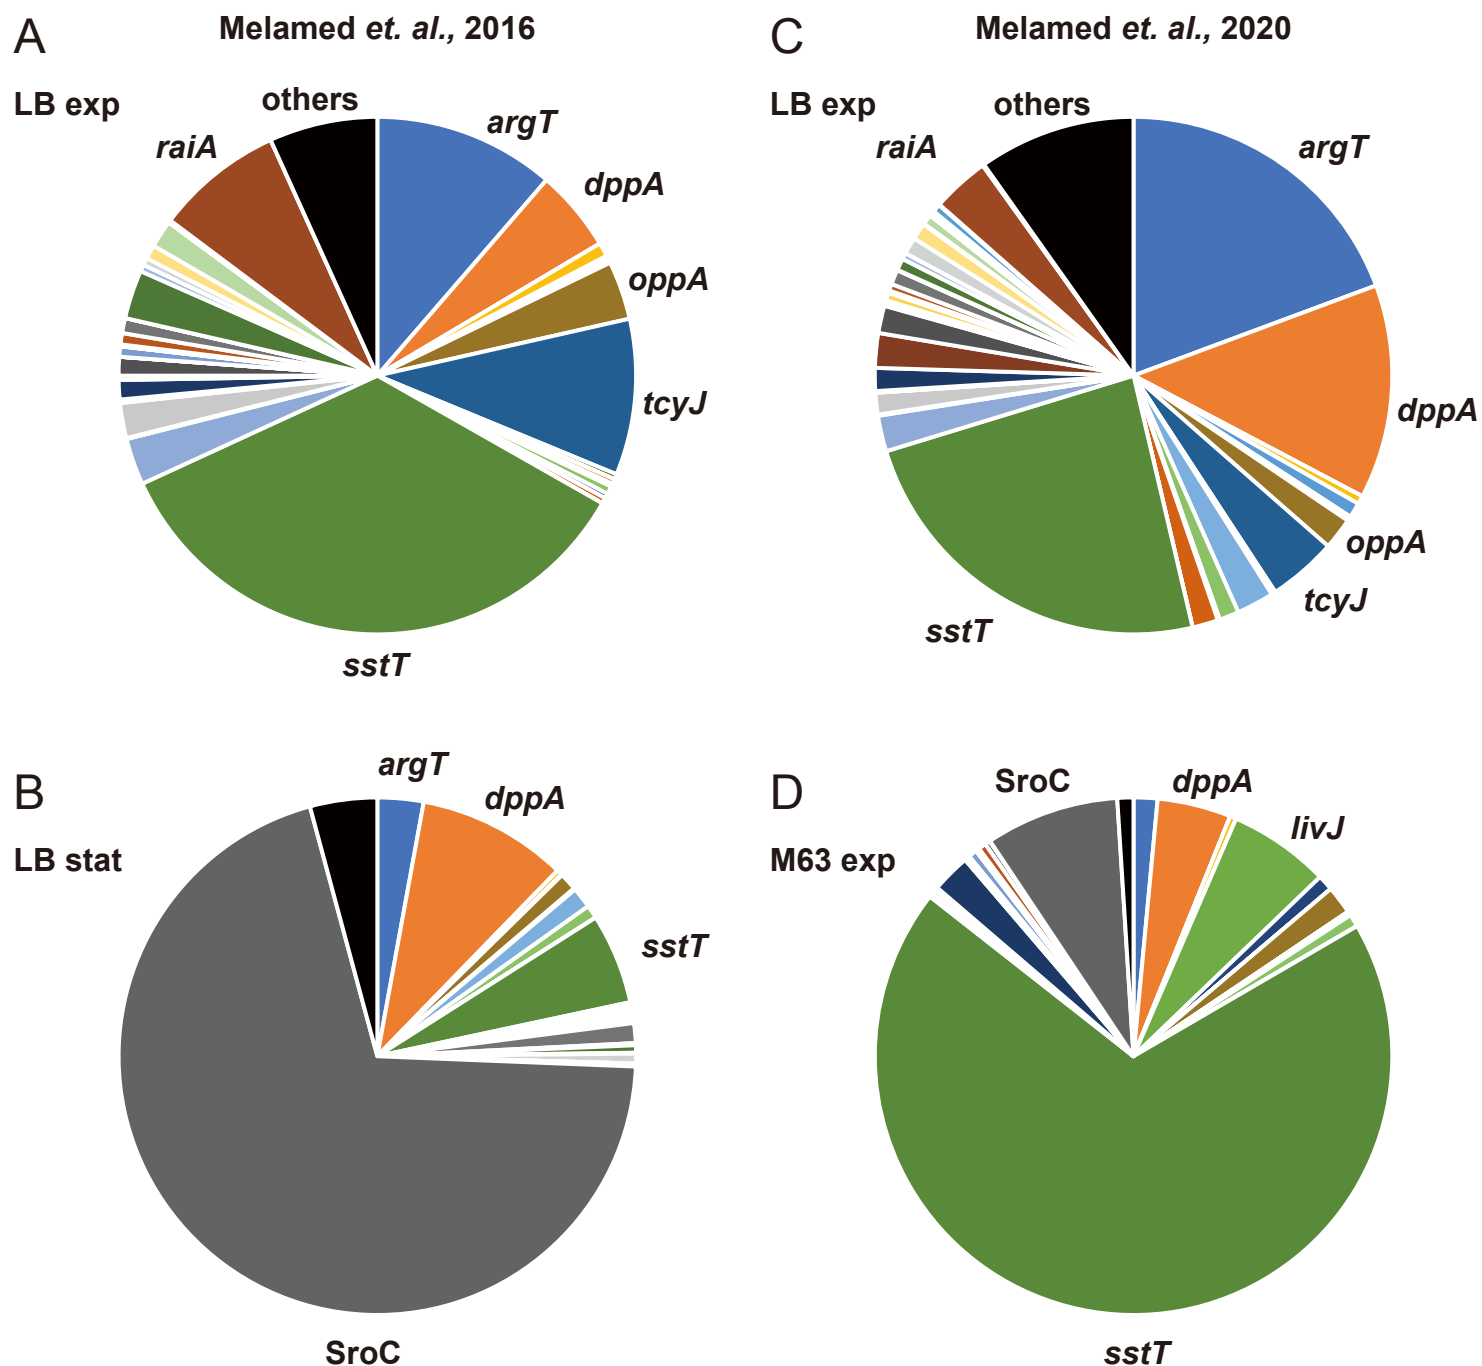

**Figure S2. Transition of GcvB regulon depending on growth conditions.** Pie chart representation of the proportion of each GcvB interactants to the total GcvB chimeric reads calculated from the RIL-seq datasets shown in Table 1. A and B were obtained from the Hfq RIL-seq datasets of *E. coli* grown in LB medium to early exponential (OD ~0.5) and stationary phase, respectively (Melamed et al., 2016). C and D were obtained from Hfq RIL-seq datasets of *E. coli* grown to late exponential phase (OD ~1.0) in LB medium and M63 minimal medium, respectively (Melamed et al., 2020).

**Table S1. Genes repeatedly detected in the datasets of RIL-seq, CLASH, and MAPS.**  
All genes overlapping among the interactome datasets are listed. Previously identified and newly validated GcvB targets are indicated in bold black and red fonts, respectively.

| Gene               | Description                                                             | MAPS         |
|--------------------|-------------------------------------------------------------------------|--------------|
| <i>acs</i>         | <b>acetyl-CoA synthetase</b>                                            | <b>34.7</b>  |
| <i>argT</i>        | lysine/arginine/ornithine transporter subunit                           | 64.2         |
| <i>aroC</i>        | <b>chorismate synthase : N5-glutamine methyltransferase</b>             | <b>20.2</b>  |
| <i>asd</i>         | <b>asparagine synthetase B</b>                                          | <b>15.8</b>  |
| <i>asnB</i>        | aspartate-semialdehyde dehydrogenase, NAD(P)-binding                    | 37.8         |
| <i>aspV</i>        | <i>aspV.yafT</i> .IGR                                                   | 16.3         |
| <i>bax</i>         | putative glucosaminidase                                                | 51.0         |
| <i>cfa</i>         | <b>cyclopropane fatty acyl phospholipid synthase</b>                    | <b>10.5</b>  |
| <i>cstA</i>        | <b>carbon starvation protein</b>                                        | <b>12.6</b>  |
| <i>cycA</i>        | D-alanine/D-serine/glycine transporter                                  | 279.3        |
| <i>dppA</i>        | <b>dipeptide/heme ABC transporter periplasmic binding protein</b>       | <b>119.6</b> |
| <i>fecA</i>        | KpLE2 phage-like element; ferric citrate outer membrane transporter     | 8.0          |
| <i>ftsB</i>        | cell division protein                                                   | 29.8         |
| <i>gatY</i>        | <b>D-tagatose 1,6-bisphosphate aldolase 2, catalytic subunit</b>        | <b>21.1</b>  |
| <i>gdhA</i>        | <b>glutamate dehydrogenase, NADP-specific</b>                           | <b>147.0</b> |
| <i>gltI</i>        | <b>glutamate and aspartate transporter subunit</b>                      | <b>236.3</b> |
| <i>gltP</i>        | <b>glutamate/aspartate:proton symporter</b>                             | <b>19.4</b>  |
| <i>icd</i>         | <b>isocitrate dehydrogenase, specific for NADP+, e14 prophage;</b>      | <b>16.6</b>  |
| <i>ilvC</i>        | <b>ketol-acid reductoisomerase, NAD(P)-binding</b>                      | <b>2.1</b>   |
| <i>kgtP</i>        | <b>alpha-ketoglutarate transporter</b>                                  | <b>34.5</b>  |
| <i>lipA</i>        | lipoate synthase                                                        | 16.3         |
| <i>livK</i>        | <b>leucine transporter subunit</b>                                      | <b>10.2</b>  |
| <i>lrp</i>         | <b>DNA-binding transcriptional dual regulator, leucine-binding</b>      | <b>547.4</b> |
| <i>maeB</i>        | fused malic enzyme predicted oxidoreductase                             | 8.4          |
| <i>mgrR</i>        | sRNA                                                                    | 12.2         |
| <i>mltC</i>        | <b>membrane-bound lytic murein transglycosylase C</b>                   | <b>41.3</b>  |
| <i>mtfA</i>        | anti-repressor for DgsA(Mlc)                                            | 30.2         |
| <i>ompF</i>        | outer membrane porin 1a (Ia;b;F) : asparaginyl tRNA synthetase          | 14.6         |
| <i>oppA</i>        | <b>oligopeptide transporter subunit</b>                                 | <b>52.3</b>  |
| <i>panD</i>        | <b>aspartate 1-decarboxylase</b>                                        | <b>207.9</b> |
| <i>raiA</i>        | cold shock protein associated with 30S ribosomal subunit                | 96.9         |
| <i>rbsK</i>        | <b>ribokinase</b>                                                       | <b>29.0</b>  |
| <i>rmf</i>         | ribosome modulation factor                                              | 91.2         |
| <i>rodZ</i>        | cytoskeletal protein required for MreB assembly                         | 19.6         |
| <i>serA</i>        | <b>D-3-phosphoglycerate dehydrogenase</b>                               | <b>90.9</b>  |
| <i>sstT</i>        | <b>sodium:serine/threonine symporter</b>                                | <b>97.2</b>  |
| <i>tcyJ (fliY)</i> | <b>cystine ABC transporter periplasmic binding protein</b>              | <b>95.2</b>  |
| <i>thrL</i>        | <b>thr operon leader peptide</b>                                        | <b>124.7</b> |
| <i>thrU</i>        | <i>coaA.thrU</i> .IGR                                                   | 7.1          |
|                    | regulator of length of O-antigen component of lipopolysaccharide chains | 18.2         |
| <i>wzzB</i>        |                                                                         |              |
| <i>yeeX</i>        | UPF0265 family protein                                                  | 10.4         |
| <i>yfhM</i>        | alpha-2-macroglobulin                                                   | 7.0          |
| <i>ygeR</i>        | putative peptidase lipoprotein                                          | 13.3         |
| <i>ygfF</i>        | putative NAD(P)-dependent oxidoreductase                                | 51.0         |
| <i>yghU</i>        | putative S-transferase                                                  | 47.9         |
| <i>yifK</i>        | <b>putative APC family amino acid transporter</b>                       | <b>35.2</b>  |
| <i>ysgA</i>        | <b>putative carboxymethylenebutenolidase</b>                            | <b>105.0</b> |

**Table S2. Comparative genome analysis of  $\Delta peps$  suppressor mutants.**

Breakpoints of deletion were detected by sprites v0.3.0 based on the K12 reference genome (NC\_000913.3). Deletions found in all the  $\Delta peps$  strains are indicated in red fonts. Large deletions acquired in the 10 suppressor mutants are highlighted in yellow. + and - represent presence and absence of a mutation respectively.

| start     | end       | JM101 | $\Delta peps$ | 1-1 | 1-2 | 2-1 | 2-2 | 3-1 | 3-2 | 4-1 | 4-2 | 5-1 | 5-2 | total | annotation    |
|-----------|-----------|-------|---------------|-----|-----|-----|-----|-----|-----|-----|-----|-----|-----|-------|---------------|
| 254,246   | 255,735   | -     | +             | +   | +   | +   | +   | +   | +   | +   | +   | +   | +   | 11    | <i>pepD</i>   |
| 256,125   | 371,374   | +     | +             | +   | +   | +   | +   | +   | +   | +   | +   | +   | +   | 12    |               |
| 990,600   | 993,256   | -     | +             | +   | +   | +   | +   | +   | +   | +   | +   | +   | +   | 11    | <i>pepN</i>   |
| 1,299,498 | 1,300,694 | +     | +             | +   | +   | +   | +   | +   | +   | +   | +   | +   | +   | 12    |               |
| 1,978,502 | 1,979,271 | +     | +             | +   | +   | +   | +   | +   | +   | +   | +   | +   | +   | 12    |               |
| 2,558,709 | 2,565,481 | +     | +             | +   | +   | +   | +   | +   | +   | +   | +   | +   | +   | 12    |               |
| 2,655,110 | 2,656,323 | -     | +             | +   | +   | +   | +   | +   | +   | +   | +   | +   | +   | 11    | <i>pepB</i>   |
| 3,625,588 | 3,720,629 | -     | -             | +   | +   | -   | -   | -   | +   | -   | -   | -   | -   | 3     | 95kb deletion |
| 3,625,590 | 3,720,631 | -     | -             | -   | -   | +   | -   | +   | -   | +   | -   | +   | +   | 5     | 95kb deletion |
| 4,484,475 | 4,485,916 | -     | +             | +   | +   | +   | +   | +   | +   | +   | +   | +   | +   | 11    | <i>pepA</i>   |
| 4,606,166 | 4,606,314 | -     | +             | +   | +   | +   | +   | +   | +   | +   | +   | +   | +   | 11    | tRNA-Leu(CAG) |

SNP calling was performed by GATK-4.0.5.2 based on the K12 reference genome (NC\_000913.3). SNPs found in all the  $\Delta peps$  strains are indicated in red fonts. SNPs acquired in the 10 suppressor mutants are highlighted in yellow. + and - represent presence and absence of a mutation respectively.

| position | SNP  | WT | $\Delta peps$ | 1-1 | 1-2 | 2-1 | 2-2 | 3-1 | 3-2 | 4-1 | 4-2 | 5-1 | 5-2 | annotation         |
|----------|------|----|---------------|-----|-----|-----|-----|-----|-----|-----|-----|-----|-----|--------------------|
| 1276421  | C->A | -  | +             | +   | +   | +   | +   | +   | +   | +   | +   | +   | +   | <i>narX</i> (D->Y) |
| 2942810  | G->A | -  | -             | -   | -   | -   | -   | -   | -   | -   | +   | -   | -   | <i>gcvB</i>        |
| 2971188  | T->A | -  | -             | -   | -   | -   | -   | -   | -   | -   | +   | -   | -   |                    |
| 3334738  | C->A | -  | +             | +   | +   | +   | +   | +   | +   | +   | +   | +   | +   |                    |
| 3702998  | C->A | -  | -             | -   | -   | -   | +   | -   | -   | -   | -   | -   | -   | <i>dppD</i> (C->F) |
| 3704067  | A->C | -  | -             | -   | -   | -   | -   | -   | -   | -   | +   | -   | -   | <i>dppC</i> (L->R) |

**Table S3. Bacterial strains used in this study.**

| Strain                                    | Relevant markers/ genotype                                                                                                                               | Reference/ source      |
|-------------------------------------------|----------------------------------------------------------------------------------------------------------------------------------------------------------|------------------------|
| <i>E. coli</i>                            |                                                                                                                                                          |                        |
| BW25113                                   | F <sup>-</sup> $\lambda$ - <i>rrnB3</i> $\Delta$ <i>lacZ4787</i> <i>hsdR514</i> $\Delta$ ( <i>araBAD</i> )567 $\Delta$ ( <i>rhaBAD</i> )568 <i>rph-1</i> | NBPR strain            |
| $\Delta$ <i>gcvB</i>                      | BW25113 $\Delta$ <i>gcvB</i> :: <i>kan</i>                                                                                                               | This study             |
| $\Delta$ <i>sroC</i>                      | BW25113 $\Delta$ <i>sroC</i> ::FRT                                                                                                                       | This study             |
| $\Delta$ <i>gcvB</i> $\Delta$ <i>sroC</i> | BW25113 $\Delta$ <i>gcvB</i> :: <i>kan</i> $\Delta$ <i>sroC</i> ::FRT                                                                                    | This study             |
| <i>gdhA</i> ::3xFLAG                      | BW25113 <i>gdhA</i> ::3xFLAG <i>kan</i>                                                                                                                  | This study             |
| $\Delta$ <i>gcvB</i> <i>gdhA</i> ::3xFLAG | BW25113 $\Delta$ <i>gcvB</i> :: FRT <i>gdhA</i> ::3xFLAG <i>kan</i>                                                                                      | This study             |
| JM101 F <sup>-</sup>                      | <i>supE</i> , <i>thi-1</i> , $\Delta$ ( <i>lac-proAB</i> ), F <sup>-</sup> ( <i>pepD</i> )                                                               | Wachi laboratory stock |
| $\Delta$ <i>peps</i>                      | JM101 F <sup>-</sup> ( <i>pepD</i> ), <i>pepN</i> , <i>pepB</i> , <i>pepA</i>                                                                            | Hayashi et al. 2010    |
| $\Delta$ <i>peps</i> $\Delta$ <i>dpp</i>  | $\Delta$ <i>peps</i> $\Delta$ <i>dppABCD</i> :: <i>kan</i>                                                                                               | This study             |
| $\Delta$ <i>peps</i> $\Delta$ <i>gcvB</i> | $\Delta$ <i>peps</i> <i>gcvB</i> :: <i>kan</i>                                                                                                           | This study             |
| $\Delta$ <i>peps</i> $\Delta$ <i>hfq</i>  | $\Delta$ <i>peps</i> <i>hfq</i> :: <i>kan</i>                                                                                                            | This study             |
| $\Delta$ <i>peps</i> $\Delta$ <i>ydeE</i> | $\Delta$ <i>peps</i> $\Delta$ <i>ydeE</i> :: <i>kan</i>                                                                                                  | This study             |

**Table S4. DNA oligonucleotides used in this study.**

| Name                                | Sequence (5' -> 3' direction)                | Used for                            |
|-------------------------------------|----------------------------------------------|-------------------------------------|
| <b>Northern blot</b>                |                                              |                                     |
| JVO-0322                            | CTACGGCGTTTCACTTCTGAGTTC                     | Probe for 5S rRNA                   |
| JVO-0749                            | TTCGTTCCGGCTCAGGA                            | Probe for GcvB 5' region            |
| <b>GcvB cloning and mutagenesis</b> |                                              |                                     |
| JVO-0237                            | ACTTCCTGAGCCGGAAC                            | GcvB cloning                        |
| MMO-0086                            | GTTTTT <b>TCTAGA</b> TAACGATACCGGTATGATTC    | GcvB cloning                        |
| MMO-0184<br>(JVO-0744)              | ATTGGTCTGCGATTCCAGA                          | GcvB R1 deletion                    |
| MMO-0185                            | ACCGTAAGCCAAAAGTTCA                          | GcvB R1 deletion                    |
| MMO-0196<br>(JVO-0895)              | ACATTTACCTGTCTGTCC                           | GcvB R2 deletion                    |
| MMO-0197                            | GAAAAAAGGTAGCTTTGCTAC                        | GcvB R2 deletion                    |
| MMO-0768                            | ATTAATGTAGCACCGCTAA                          | GcvB R3 deletion                    |
| MMO-0769                            | TAAATGTACAGGAAGTAAAAAAG                      | GcvB R3 deletion                    |
| JVO-9214                            | CCTGTCT <b>CTCC</b> ATAGTGATTAATGTAGCAC      | GcvB G160C mutation                 |
| JVO-9215                            | CTATGGAGAGACAGGGTAAATGTACAGG                 | GcvB G160C mutation                 |
| MMO-0342                            | TACCTC <b>ctctgtcc</b> ATAGTGATTAATG         | GcvB G156C mutation                 |
| MMO-0343                            | GACAGAGAGGGTAAATGTACAGGAAG                   | GcvB G156C mutation                 |
| MMO-0391                            | TACCGACAG <b>gtctcc</b> ATAGTGATTAATG        | GcvB mutR3 mutation                 |
| MMO-0392                            | GACA <b>CTGTC</b> GGTAAATGTACAGGAAG          | GcvB mutR3 mutation                 |
| MMO-0776                            | GTCTGT <b>CTCC</b> ATAGTGATTAATGTAGCAC       | GcvB C162G mutation                 |
| MMO-0777                            | ACTAT <b>CTCC</b> ACAGACAGGGTAAATGTA         | GcvB C162G mutation                 |
| <b>GcvB target cloning</b>          |                                              |                                     |
| MMO-0199                            | GTTTT <b>ATGCAT</b> GCAAAAGCACATGACATA       | <i>gdhA</i> GFP fusion cloning      |
| MMO-0201                            | GTTTT <b>GCTAGC</b> GAGGAATGACTCCAGAGA       | <i>gdhA</i> GFP fusion cloning      |
| MMO-0327                            | GTTTT <b>ATGCAT</b> ATCAAAGAGTTGCTGGAAG      | <i>sucB-sucC</i> GFP fusion cloning |
| MMO-0328                            | GTTTT <b>GCTAGC</b> TTGTTTTGCCTGATATTC       | <i>sucB-sucC</i> GFP fusion cloning |
| MMO-0459                            | GTTTT <b>ATGCAT</b> ACTTACATATATATTGTCGGTATC | <i>map</i> GFP fusion cloning       |
| MMO-0461                            | GTTTT <b>GCTAGC</b> GACGCGCATTTTTTCGAT       | <i>map</i> GFP fusion cloning       |
| MMO-0462                            | GTTTT <b>ATGCAT</b> AATGTAACATCTCTATGGACAC   | <i>cstA</i> GFP fusion cloning      |
| MMO-0464                            | GTTTT <b>GCTAGC</b> GATCTGTTCCCCACGAT        | <i>cstA</i> GFP fusion cloning      |
| MMO-0465                            | GTTTT <b>ATGCAT</b> ATTTTTGCCATGCTATTTCTTTA  | <i>ydeE</i> GFP fusion cloning      |
| MMO-0466                            | GTTTT <b>GCTAGC</b> GGTTAATAACAACGACGAGG     | <i>ydeE</i> GFP fusion cloning      |
| MMO-0469                            | GTTTT <b>ATGCAT</b> CACAAATATGACAGTGGCG      | <i>rmf</i> GFP fusion cloning       |
| MMO-0470                            | GTTTT <b>GCTAGC</b> GGCCATTACTACCTGTCT       | <i>rmf</i> GFP fusion cloning       |
| MMO-0477                            | GTTTT <b>ATGCAT</b> TAATTCGATTTTGTATGTTTATGG | <i>hisJ-hisQ</i> GFP fusion cloning |
| MMO-0478                            | GTTTT <b>GCTAGC</b> TAAAATAACACCTGAAAACCC    | <i>hisJ-hisQ</i> GFP fusion cloning |
| MMO-0790                            | GTTTT <b>ATGCAT</b> CTTTACAAAAAATAAACAAAAGC  | <i>kgtP</i> GFP fusion cloning      |
| MMO-0791                            | GTTTT <b>GCTAGC</b> GACATAGAAATCGAACCC       | <i>kgtP</i> GFP fusion cloning      |
| MMO-0792                            | GTTTT <b>ATGCAT</b> ATAACGCGCATCTTTTCATGA    | <i>icd</i> GFP fusion cloning       |
| MMO-0793                            | GTTTT <b>GCTAGC</b> TTGTGCCGGAACAACCTAC      | <i>icd</i> GFP fusion cloning       |
| MMO-0794                            | GTTTT <b>ATGCAT</b> AAAAAATCTACAACCAACGC     | <i>gltP</i> GFP fusion cloning      |
| MMO-0795                            | GTTTT <b>GCTAGC</b> GCTATGGTAGTGCAGGTAG      | <i>gltP</i> GFP fusion cloning      |
| MMO-0798                            | GTTTT <b>ATGCAT</b> AAGAACTCAACATGATGA       | <i>yggX-mltC</i> GFP fusion cloning |
| MMO-0799                            | GTTTT <b>GCTAGC</b> CAGAATATCAAACCGTTG       | <i>yggX-mltC</i> GFP fusion cloning |
| MMO-0800                            | GTTTT <b>ATGCAT</b> AAAGGCGAGAAAGTTCAG       | <i>rbsB-rbsK</i> GFP fusion cloning |
| MMO-0801                            | GTTTT <b>GCTAGC</b> ATTAAGAATGTGGTCAGCA      | <i>rbsB-rbsK</i> GFP fusion cloning |
| MMO-0803                            | GTTTT <b>ATGCAT</b> CAATATCCGATGTTCCGTTT     | <i>prnB-aroC</i> GFP fusion cloning |
| MMO-0804                            | GTTTT <b>GCTAGC</b> AACACCATCGACGATGCA       | <i>prnB-aroC</i> GFP fusion cloning |
| MMO-0805                            | GTTTT <b>ATGCAT</b> AACCTCTTTGATGTAACAATAAT  | <i>aroP</i> GFP fusion cloning      |
| MMO-0806                            | GTTTT <b>GCTAGC</b> AATATGGCGGTTTTTAAGG      | <i>aroP</i> GFP fusion cloning      |
| MMO-0817                            | GTTTT <b>ATGCAT</b> AGCGGGCTTTTTTTGAAC       | <i>trpE</i> GFP fusion cloning      |
| MMO-0818                            | GTTTT <b>GCTAGC</b> CCACACAACCTGGTGAAG       | <i>trpE</i> GFP fusion cloning      |
| MMO-0819                            | GTTTT <b>ATGCAT</b> CCTACAAGGAGAACAAGG       | <i>acs</i> GFP fusion cloning       |
| MMO-0820                            | GTTTT <b>GCTAGC</b> TTGTTGATACATCGCCTCG      | <i>acs</i> GFP fusion cloning       |
| MMO-0821                            | GTTTT <b>ATGCAT</b> ATGTGCCAAGAGGAGACC       | <i>asd</i> GFP fusion cloning       |
| MMO-0822                            | GTTTT <b>GCTAGC</b> GCGTTGCATGAGAACGGA       | <i>asd</i> GFP fusion cloning       |
| MMO-0925                            | GTTTT <b>ATGCAT</b> ACACGTCCGAGTTTGGT        | <i>purU</i> GFP fusion cloning      |

|                                 |                                                                                  |                                            |
|---------------------------------|----------------------------------------------------------------------------------|--------------------------------------------|
| MMO-0926                        | GTTTTT <b>GCTAGC</b> GATCAGACCTTTTTGGTCCGG                                       | <i>purU</i> GFP fusion cloning             |
| MMO-0861                        | GTTTTT <b>ATGCAT</b> AAATATTGTTAAACACAAAACCAACAAG                                | <i>ivbL</i> GFP fusion cloning             |
| MMO-0862                        | GTTTTT <b>GCTAGC</b> TAGTTTTGCGTTGAGCATGG                                        | <i>ivbL</i> GFP fusion cloning             |
| MMO-0863                        | GTTTTT <b>ATGCAT</b> TTTTTCGTTAAGCACCTCCC                                        | <i>ivbB</i> GFP fusion cloning             |
| MMO-0864                        | GTTTTT <b>GCTAGC</b> AACGATAAAATCTGCGCCG                                         | <i>ivbB</i> GFP fusion cloning             |
| MMO-0865                        | GTTTTT <b>ATGCAT</b> ATTA AACGCATCATAAAAATCGGCC                                  | <i>ivlL</i> GFP fusion cloning             |
| MMO-0889                        | GTTTTT <b>GCTAGC</b> GGCTGTCATTTTGTCTTTTCTTGC                                    | <i>ivlL</i> GFP fusion cloning             |
| MMO-0867                        | GTTTTT <b>ATGCAT</b> ACCTTAAAAACATAACCGAGGAGC                                    | <i>ivlX</i> GFP fusion cloning             |
| MMO-0868                        | GTTTTT <b>GCTAGC</b> GTCCCGTCCTGAATCTTGAG                                        | <i>ivlX</i> GFP fusion cloning             |
| MMO-0890                        | GTTTTT <b>ATGCAT</b> GAAACCGAAGATAAATGGGGCTGG                                    | <i>ivlE-ivlD</i> GFP fusion cloning        |
| MMO-0870                        | GTTTTT <b>GCTAGC</b> ACCCGCCATATTACGACCATGAG                                     | <i>ivlE-ivlD</i> GFP fusion cloning        |
| MMO-0871                        | GTTTTT <b>ATGCAT</b> TACCTGCTTCATGTCTCAATCGACG                                   | <i>ivlG-ivlM</i> GFP fusion cloning        |
| MMO-0872                        | GTTTTT <b>GCTAGC</b> CACGCGTAAACACGTTCTAAGGTTC                                   | <i>ivlG-ivlM</i> GFP fusion cloning        |
| <b>GcvB target mutagenesis</b>  |                                                                                  |                                            |
| MMO-0335                        | GATGGAGAGAACACATGAACCTTACATGA                                                    | <i>sucC</i> C-8G                           |
| MMO-0454                        | TGTTCTCTCCATCCTTCAGTAATCGA                                                       | <i>sucC</i> C-8G                           |
| MMO-0492                        | GATGGAGAGAATTAATGGCTATCTCAATCAAGAC                                               | <i>map</i> C-8G                            |
| MMO-0493                        | AATTCCTCCATCAGCGTCGGTGA                                                          | <i>map</i> C-8G                            |
| MMO-0494                        | GCCGGAGAGACAAATGAACCTTATCCCTACGACG                                               | <i>ydeE</i> C-7G                           |
| MMO-0495                        | TTGTCTCTCCGGCAGTGCCTTTCG                                                         | <i>ydeE</i> C-7G                           |
| MMO-0784                        | TCTATGCACACGCACACGGATAA                                                          | <i>cstA</i> G-22C                          |
| MMO-0785                        | GCGTGTGCATAGAGATGTTACATTATGCATG                                                  | <i>cstA</i> G-22C                          |
| MMO-0736                        | GGATGCTGTCAACACATGAACCTTACATGAA                                                  | <i>sucC</i> mutR3                          |
| MMO-0737                        | GTGTTGACAGCATCCTTCAGGTAATCGT                                                     | <i>sucC</i> mutR3                          |
| MMO-0774                        | TCTATGCATCAGACATATTCTCTGG                                                        | <i>gdhA</i> G4C                            |
| MMO-0775                        | TCTGATGCATAGATATAAAACCTTATATATTA                                                 | <i>gdhA</i> G4C                            |
| MMO-0784                        | TCTATGCACACGCACACGGATAA                                                          | <i>cstA</i> G-22C                          |
| MMO-0785                        | GCGTGTGCATAGAGATGTTACATTATGCATG                                                  | <i>cstA</i> G-22C                          |
| MMO-0930                        | GACAGAGACTGGGAGTAAATAAAGTATGC                                                    | <i>ivlD</i> C-19G                          |
| MMO-0931                        | CCCAGTCTCTGTCTCGTAAATGGGAC                                                       | <i>ivlD</i> C-19G                          |
| <b>Lambda Red recombination</b> |                                                                                  |                                            |
| JVO-0131                        | TTCTACCAGCAAATACCTATAGTGGCGGCACTTCCTGAGCCGGAAGT <b>GTAGGCTGGAGCTGCTTC</b>        | <i>gcvB</i> deletion with pKD4             |
| JVO-0132                        | TCGCGATCGCAAGGTAAAAAAGCACCGCAATTAGGCGGTGCTAGG <b>TCCATATGAATATCCTCCTTAG</b>      | <i>gcvB</i> deletion with pKD4             |
| JVO-7614                        | CGAAATGAAAGCACTGTTCAAAGAACCGAATGACAAGGCACTGAAC <b>TAAAGTGTAGGCTGGAGCTGCTTC</b>   | <i>sroC</i> deletion with pKD4             |
| JVO-7615                        | ACATAAATCTACTCCAGAAAAAGAGGGTAGCAGCGTTAACTGCTACCC <b>GGTCCATATGAATATCCTCCTTAG</b> | <i>sroC</i> deletion with pKD4             |
| MMO-0206                        | TGTGAAGGTTGCCGATGCCGATGCTGGCGCAGGGTGTGATT <b>GACTACAAGACCATGACCG</b>             | <i>gdhA</i> ::3xFLAG insertion with pSUB13 |
| MMO-0207                        | TGTGCCCATTTGTAGGCCTGATAAGCGTAGCGCCATCAGGT <b>CCATATGAATA TCCTCCTTAG</b>          | <i>gdhA</i> ::3xFLAG insertion with pSUB13 |
| dppA-P1-R                       | GCATCCCCACCTCATAACGTTGACCCGACCGGCAAGT <b>GTAGGCTGGAGCTGCTTC</b>                  | <i>dppABCD</i> F deletion with pKD13       |
| dppF-P4-F                       | CTGTACGGCATTGTTGCTATGCTTGTGCGCCACTGTT <b>GATTCCGGGGATCCGTCGACC</b>               | <i>dppABCD</i> F deletion with pKD13       |
| ydeE-P1-R                       | AATTAATCTTTATTGTTGCTGACTTAAATCAACAAAGCGCGGGCTG <b>CCCGTGTAGGCTGGAGCTGCTTC</b>    | <i>ydeE</i> deletion with pKD13            |
| ydeE-P4-F                       | TACATCTCTAAAACAAAACATAACGAAACGCCTGCCGGACAGACAA <b>TGCAACATGAGAATTAATTC</b>       | <i>ydeE</i> deletion with pKD13            |
| <b>ydeE cloning</b>             |                                                                                  |                                            |
| pSydeE-5'                       | ATAG <b>CAATTC</b> TAAACAGTTGATTTCGTTAGTC                                        | <i>ydeE</i> cloning                        |
| pSydeE-3'                       | ATAG <b>GGATCC</b> TCAACAAAGCGCGGGCTGCC                                          | <i>ydeE</i> cloning                        |



**Table S5. Plasmids used in this study.**

| Name                          | Relevant fragment                        | Comment                                                                                                             | Origin / marker           | Reference             |
|-------------------------------|------------------------------------------|---------------------------------------------------------------------------------------------------------------------|---------------------------|-----------------------|
| pTP11                         | control plasmid                          | Control plasmid based on pJV300, ColE1 origin replaced by p15A origin                                               | p15A / Amp <sup>R</sup>   | Sharma et al., 2011   |
| pP <sub>L</sub> -gcvB         | P <sub>Llac-0</sub> -gcvB                | <i>E. coli</i> gcvB mid-copy expression plasmid, gcvB is controlled by the constitutive P <sub>Llac0</sub> promoter | p15A / Amp <sup>R</sup>   | this study            |
| pP <sub>L</sub> -gcvBΔR1      | P <sub>Llac-0</sub> -gcvBΔR1             | <i>E. coli</i> gcvB deletion of position 66 – 91                                                                    | p15A / Amp <sup>R</sup>   | this study            |
| pP <sub>L</sub> -gcvBΔR2      | P <sub>Llac-0</sub> -gcvBΔR2             | <i>E. coli</i> gcvB deletion of position 136 – 144                                                                  | p15A / Amp <sup>R</sup>   | this study            |
| pP <sub>L</sub> -gcvBΔR3      | P <sub>Llac-0</sub> -gcvBΔR3             | <i>E. coli</i> gcvB deletion of position 152 – 169                                                                  | p15A / Amp <sup>R</sup>   | this study            |
| pP <sub>L</sub> -gcvBΔR12     | P <sub>Llac-0</sub> -gcvBΔR12            | <i>E. coli</i> gcvB deletion of position 66 – 91 and 136 – 169                                                      | p15A / Amp <sup>R</sup>   | this study            |
| pP <sub>L</sub> -gcvBΔR13     | P <sub>Llac-0</sub> -gcvBΔR13            | <i>E. coli</i> gcvB deletion of position 66 – 91 and 152 – 169                                                      | p15A / Amp <sup>R</sup>   | this study            |
| pP <sub>L</sub> -gcvBΔR123    | P <sub>Llac-0</sub> -gcvBΔR123           | <i>E. coli</i> gcvB deletion of position 66 - 169                                                                   | p15A / Amp <sup>R</sup>   | this study            |
| pP <sub>L</sub> -gcvBΔR1mutR3 | P <sub>Llac-0</sub> -gcvBΔR1mutR3        | <i>E. coli</i> gcvBΔR1 mutant in position 154 – 158 (CTGTC->GACAG)                                                  | p15A / Amp <sup>R</sup>   | this study            |
| pP <sub>L</sub> -gcvBΔR1G156C | P <sub>Llac-0</sub> -gcvBΔR1G156C        | <i>E. coli</i> gcvBΔR1 mutant in position 156 (G->C)                                                                | p15A / Amp <sup>R</sup>   | this study            |
| pP <sub>L</sub> -gcvBΔR1C160G | P <sub>Llac-0</sub> -gcvBΔR1C160G        | <i>E. coli</i> gcvBΔR1 mutant in position 160 (C->G)                                                                | p15A / Amp <sup>R</sup>   | this study            |
| pP <sub>L</sub> -gcvBΔR1C162G | P <sub>Llac-0</sub> -gcvBΔR1C162G        | <i>E. coli</i> gcvBΔR1 mutant in position 162 (C->G)                                                                | p15A / Amp <sup>R</sup>   | this study            |
| pXG-10sf                      | P <sub>Ltet0</sub> -lacZ::gfp            | Plasmid for construction of translational sfGFP fusion                                                              | pSC101* / Cm <sup>R</sup> | Corcoran et al., 2012 |
| pXG-30sf                      | P <sub>Ltet0</sub> -FLAG::glmU-glmS::gfp | Plasmid for construction of translational sfGFP fusions of dicistronic targets                                      | pSC101* / Cm <sup>R</sup> | Corcoran et al., 2012 |
| pXG-10sf-gdhA                 | P <sub>Ltet0</sub> -gdhA::gfp            | <i>E. coli</i> gdhA translational GFP fusion plasmid                                                                | pSC101* / Cm <sup>R</sup> | this study            |
| pXG-10sf-map                  | P <sub>Ltet0</sub> -map::gfp             | <i>E. coli</i> map translational GFP fusion plasmid                                                                 | pSC101* / Cm <sup>R</sup> | this study            |
| pXG-10sf-cstA                 | P <sub>Ltet0</sub> -cstA::gfp            | <i>E. coli</i> cstA translational GFP fusion plasmid                                                                | pSC101* / Cm <sup>R</sup> | this study            |
| pXG-10sf-ydeE                 | P <sub>Ltet0</sub> -ydeE::gfp            | <i>E. coli</i> ydeE translational GFP fusion plasmid                                                                | pSC101* / Cm <sup>R</sup> | this study            |
| pXG-10sf-rmf                  | P <sub>Ltet0</sub> -rmf::gfp             | <i>E. coli</i> rmf translational GFP fusion plasmid                                                                 | pSC101* / Cm <sup>R</sup> | this study            |
| pXG-10sf-kgtP                 | P <sub>Ltet0</sub> -kgtP::gfp            | <i>E. coli</i> kgtP translational GFP fusion plasmid                                                                | pSC101* / Cm <sup>R</sup> | this study            |
| pXG-10sf-icd                  | P <sub>Ltet0</sub> -icd::gfp             | <i>E. coli</i> icd translational GFP fusion plasmid                                                                 | pSC101* / Cm <sup>R</sup> | this study            |
| pXG-10sf-gltP                 | P <sub>Ltet0</sub> -gltP::gfp            | <i>E. coli</i> gltP translational GFP fusion plasmid                                                                | pSC101* / Cm <sup>R</sup> | this study            |
| pXG-10sf-aroP                 | P <sub>Ltet0</sub> -aroP::gfp            | <i>E. coli</i> aroP translational GFP fusion plasmid                                                                | pSC101* / Cm <sup>R</sup> | this study            |
| pXG-10sf-trpE                 | P <sub>Ltet0</sub> -trpE::gfp            | <i>E. coli</i> trpE translational GFP fusion plasmid                                                                | pSC101* / Cm <sup>R</sup> | this study            |
| pXG-10sf-acs                  | P <sub>Ltet0</sub> -acs::gfp             | <i>E. coli</i> acs translational GFP fusion plasmid                                                                 | pSC101* / Cm <sup>R</sup> | this study            |
| pXG-10sf-asd                  | P <sub>Ltet0</sub> -asd::gfp             | <i>E. coli</i> asd translational GFP fusion plasmid                                                                 | pSC101* / Cm <sup>R</sup> | this study            |
| pXG-10sf-purU                 | P <sub>Ltet0</sub> -purU::gfp            | <i>E. coli</i> purU translational GFP fusion plasmid                                                                | pSC101* / Cm <sup>R</sup> | this study            |

|                            |                                                  |                                                           |                              |            |
|----------------------------|--------------------------------------------------|-----------------------------------------------------------|------------------------------|------------|
| pXG-10sf- <i>ivbL</i>      | P <sub>Ltet0</sub> - <i>ivbL::gfp</i>            | <i>E. coli ivbL</i> translational GFP fusion plasmid      | pSC101*/ Cm <sup>R</sup>     | this study |
| pXG-10sf- <i>ilvB</i>      | P <sub>Ltet0</sub> - <i>ilvB::gfp</i>            | <i>E. coli ilvB</i> translational GFP fusion plasmid      | pSC101*/ Cm <sup>R</sup>     | this study |
| pXG-10sf- <i>ilvL</i>      | P <sub>Ltet0</sub> - <i>ilvL::gfp</i>            | <i>E. coli ilvL</i> translational GFP fusion plasmid      | pSC101*/ Cm <sup>R</sup>     | this study |
| pXG-10sf- <i>ilvX</i>      | P <sub>Ltet0</sub> - <i>ilvX::gfp</i>            | <i>E. coli ilvX</i> translational GFP fusion plasmid      | pSC101*/ Cm <sup>R</sup>     | this study |
| pXG-30sf- <i>ilvED</i>     | P <sub>Ltet0</sub> -FLAG:: <i>ilvE-ilvD::gfp</i> | <i>E. coli ilvED</i> translational GFP fusion plasmid     | pSC101*/ Cm <sup>R</sup>     | this study |
| pXG-30sf- <i>ilvGM</i>     | P <sub>Ltet0</sub> -FLAG:: <i>ilvG-ilvM::gfp</i> | <i>E. coli ilvGM</i> translational GFP fusion plasmid     | pSC101*/ Cm <sup>R</sup>     | this study |
| pXG-30sf- <i>sucBC</i>     | P <sub>Ltet0</sub> -FLAG:: <i>sucB-sucC::gfp</i> | <i>E. coli sucBC</i> translational GFP fusion plasmid     | pSC101*/ Cm <sup>R</sup>     | this study |
| pXG-30sf- <i>hisJQ</i>     | P <sub>Ltet0</sub> -FLAG:: <i>hisJ-hisQ::gfp</i> | <i>E. coli hisJQ</i> translational GFP fusion plasmid     | pSC101*/ Cm <sup>R</sup>     | this study |
| pXG-30sf- <i>yggX-mltC</i> | P <sub>Ltet0</sub> -FLAG:: <i>yggX-mltC::gfp</i> | <i>E. coli yggX-mltC</i> translational GFP fusion plasmid | pSC101*/ Cm <sup>R</sup>     | this study |
| pXG-30sf- <i>rbsBK</i>     | P <sub>Ltet0</sub> -FLAG:: <i>rbsB-rbsK::gfp</i> | <i>E. coli rbsBK</i> translational GFP fusion plasmid     | pSC101*/ Cm <sup>R</sup>     | this study |
| pXG-30sf- <i>prmB-aroC</i> | P <sub>Ltet0</sub> -FLAG:: <i>prmB-aroC::gfp</i> | <i>E. coli prmB-aroC</i> translational GFP fusion plasmid | pSC101*/ Cm <sup>R</sup>     | this study |
| pSydeE                     | P <sub>lac</sub> - <i>ydeE</i>                   | <i>E. coli ydeE</i> expression plasmid                    | pACYC184/<br>Cm <sup>R</sup> | this study |

**Table S6. Inserts of *GcvB* mutant plasmids.**

Black letters indicate the *gcvB* wild-type sequence, R1, R2, and R3 seed sequences are highlighted in yellow, green and cyan, respectively. The modified nucleotides are highlighted in magenta.

| Plasmid                                | Insert from +1 to end of <i>gcvB</i> terminator                                                                                                                                                                                                         | Positions deleted or mutated           |
|----------------------------------------|---------------------------------------------------------------------------------------------------------------------------------------------------------------------------------------------------------------------------------------------------------|----------------------------------------|
| pP <sub>L</sub> - <i>gcvB</i>          | ACTTCCTGAGCCGGAACGAAAAGTTTTATCGGAATGCGTGTCTGGTGAACCTT<br>TTGGCTTACGGT <b>GTGATGTTGTGTTGTTGTTGCA</b> ATTGGTCTGCGATTTC<br>AGACCATGGTAGCAAAGCTACCTTTTTT <b>ACTTCCTGTA</b> CATTTA <b>CCCTGTCT</b><br><b>GTCCATAGT</b> ATTAATGTAGCACCGCCTAATTGCGGTGCTTTTTTTT | none                                   |
| pP <sub>L</sub> - <i>gcvB</i> ΔR1      | ACTTCCTGAGCCGGAACGAAAAGTTTTATCGGAATGCGTGTCTGGTGAACCTT<br>TTGGCTTACGGTATTGGTCTGCGATT <b>CAGACCATGGTAGCAAAGCTACCTTTT</b><br>TTC <b>ACTTCCTGTA</b> CATTTA <b>CCCTGTCTGTCCATAGT</b> ATTAATGTAGCACCGC<br>CTAATTGCGGTGCTTTTTTTT                               | 66 - 91                                |
| pP <sub>L</sub> - <i>gcvB</i> ΔR2      | ACTTCCTGAGCCGGAACGAAAAGTTTTATCGGAATGCGTGTCTGGTGAACCTT<br>TTGGCTTACGGT <b>GTGATGTTGTGTTGTTGTTGCA</b> ATTGGTCTGCGATTTC<br>AGACCATGGTAGCAAAGCTACCTTTTTTCCATTTA <b>CCCTGTCTGTCCATAGT</b><br>ATTAATGTAGCACCGCCTAATTGCGGTGCTTTTTTTT                           | 136 - 144                              |
| pP <sub>L</sub> - <i>gcvB</i> ΔR3      | ACTTCCTGAGCCGGAACGAAAAGTTTTATCGGAATGCGTGTCTGGTGAACCTT<br>TTGGCTTACGGT <b>GTGATGTTGTGTTGTTGTTGCA</b> ATTGGTCTGCGATTTC<br>AGACCATGGTAGCAAAGCTACCTTTTTT <b>ACTTCCTGTA</b> CATTTAATTAATGT<br>AGCACCGCCTAATTGCGGTGCTTTTTTTT                                  | 152 - 169                              |
| pP <sub>L</sub> - <i>gcvB</i> ΔR12     | ACTTCCTGAGCCGGAACGAAAAGTTTTATCGGAATGCGTGTCTGGTGAACCTT<br>TTGGCTTACGGTATTGGTCTGCGATT <b>CAGACCATGGTAGCAAAGCTACCTTTT</b><br>TTCCATTTA <b>CCCTGTCTGTCCATAGT</b> ATTAATGTAGCACCGCCTAATTGCGG<br>TGCTTTTTTTT                                                  | 66 - 91<br>136 - 144                   |
| pP <sub>L</sub> - <i>gcvB</i> ΔR13     | ACTTCCTGAGCCGGAACGAAAAGTTTTATCGGAATGCGTGTCTGGTGAACCTT<br>TTGGCTTACGGTATTGGTCTGCGATT <b>CAGACCATGGTAGCAAAGCTACCTTTT</b><br>TTC <b>ACTTCCTGTA</b> CATTTAATTAATGTAGCACCGCCTAATTGCGGTGCTTTTT<br>TTT                                                         | 66 - 89<br>152 - 169                   |
| pP <sub>L</sub> - <i>gcvB</i> ΔR123    | ACTTCCTGAGCCGGAACGAAAAGTTTTATCGGAATGCGTGTCTGGTGAACCTT<br>TTGGCTTACGGTATTAATGTAGCACCGCCTAATTGCGGTGCTTTTTTTT                                                                                                                                              | 66 - 169                               |
| pP <sub>L</sub> - <i>gcvB</i> ΔR1mutR3 | ACTTCCTGAGCCGGAACGAAAAGTTTTATCGGAATGCGTGTCTGGTGAACCTT<br>TTGGCTTACGGTATTGGTCTGCGATT <b>CAGACCATGGTAGCAAAGCTACCTTTT</b><br>TTC <b>ACTTCCTGTA</b> CATTTA <b>CCGACAGTGTCCATAGT</b> ATTAATGTAGCACCGC<br>CTAATTGCGGTGCTTTTTTTT                               | 66 - 89<br>154 - 158<br>(CTGTC->GACAG) |
| pP <sub>L</sub> - <i>gcvB</i> ΔR1G156C | ACTTCCTGAGCCGGAACGAAAAGTTTTATCGGAATGCGTGTCTGGTGAACCTT<br>TTGGCTTACGGTATTGGTCTGCGATT <b>CAGACCATGGTAGCAAAGCTACCTTTT</b><br>TTC <b>ACTTCCTGTA</b> CATTTA <b>CCCTCTCTGTCCATAGT</b> ATTAATGTAGCACCGC<br>CTAATTGCGGTGCTTTTTTTT                               | 66 - 89<br>156 (G->C)                  |
| pP <sub>L</sub> - <i>gcvB</i> ΔR1C160G | ACTTCCTGAGCCGGAACGAAAAGTTTTATCGGAATGCGTGTCTGGTGAACCTT<br>TTGGCTTACGGTATTGGTCTGCGATT <b>CAGACCATGGTAGCAAAGCTACCTTTT</b><br>TTC <b>ACTTCCTGTA</b> CATTTA <b>CCCTGTCTGTCCATAGT</b> ATTAATGTAGCACCGC<br>CTAATTGCGGTGCTTTTTTTT                               | 66 - 89<br>160 (C->G)                  |
| pP <sub>L</sub> - <i>gcvB</i> ΔR1C162G | ACTTCCTGAGCCGGAACGAAAAGTTTTATCGGAATGCGTGTCTGGTGAACCTT<br>TTGGCTTACGGTATTGGTCTGCGATT <b>CAGACCATGGTAGCAAAGCTACCTTTT</b><br>TTC <b>ACTTCCTGTA</b> CATTTA <b>CCCTGTCTGTCCATAGT</b> ATTAATGTAGCACCGC<br>CTAATTGCGGTGCTTTTTTTT                               | 66 - 89<br>162 (C->G)                  |

**Table S7. Details of GFP fusion plasmids.**

| Target gene      | Backbone | Oligos used to amplify insert | Insert digested with | Upstream ORF [bp] | Intergenic region [bp] | Downstream ORF [bp] | Insert length [bp] | Translational fusion to N-terminal FLAG [aa] | Translational fusion to C-terminal GFP [aa] |
|------------------|----------|-------------------------------|----------------------|-------------------|------------------------|---------------------|--------------------|----------------------------------------------|---------------------------------------------|
| <i>gdhA</i>      | pXG-10sf | MMO-0199 x MMO-0201           | Nsil/NheI            | -                 | 63                     | 33                  | 96                 | -                                            | 11                                          |
| <i>map</i>       | pXG-10sf | MMO-0459 x MMO-0461           | Nsil/NheI            | -                 | 47                     | 48                  | 95                 | -                                            | 16                                          |
| <i>cstA</i>      | pXG-10sf | MMO-0462 x MMO-0464           | Nsil/NheI            | -                 | 39                     | 96                  | 135                | -                                            | 32                                          |
| <i>ydeE</i>      | pXG-10sf | MMO-0465 x MMO-0466           | Nsil/NheI            | -                 | 69                     | 60                  | 129                | -                                            | 20                                          |
| <i>rmf</i>       | pXG-10sf | MMO-0469 x MMO-0470           | Nsil/NheI            | -                 | 132                    | 165                 | 297                | -                                            | 55                                          |
| <i>kgtP</i>      | pXG-10sf | MMO-0790 x MMO-0791           | Nsil/NheI            | -                 | 66                     | 120                 | 186                | -                                            | 40                                          |
| <i>icd</i>       | pXG-10sf | MMO-0792 x MMO-0793           | Nsil/NheI            | -                 | 162                    | 30                  | 192                | -                                            | 10                                          |
| <i>gltP</i>      | pXG-10sf | MMO-0794 x MMO-0795           | Nsil/NheI            | -                 | 103                    | 90                  | 193                | -                                            | 30                                          |
| <i>aroP</i>      | pXG-10sf | MMO-0805 x MMO-0806           | Nsil/NheI            | -                 | 99                     | 60                  | 159                | -                                            | 20                                          |
| <i>trpE</i>      | pXG-10sf | MMO-0817 x MMO-0818           | Nsil/NheI            | -                 | 36                     | 90                  | 126                | -                                            | 30                                          |
| <i>acs</i>       | pXG-10sf | MMO-0819 x MMO-0820           | Nsil/NheI            | -                 | 20                     | 90                  | 110                | -                                            | 30                                          |
| <i>asd</i>       | pXG-10sf | MMO-0821 x MMO-0822           | Nsil/NheI            | -                 | 61                     | 60                  | 121                | -                                            | 20                                          |
| <i>purU</i>      | pXG-10sf | MMO-0925 x MMO-0926           | Nsil/NheI            | -                 | 127                    | 60                  | 187                | -                                            | 20                                          |
| <i>ivbL</i>      | pXG-10sf | MMO-0861 x MMO-0862           | Nsil/NheI            | -                 | 35                     | 30                  | 65                 | -                                            | 10                                          |
| <i>ilvB</i>      | pXG-10sf | MMO-0863 x MMO-0864           | Nsil/NheI            | -                 | 53                     | 60                  | 113                | -                                            | 20                                          |
| <i>ilvL</i>      | pXG-10sf | MMO-0865 x MMO-0889           | Nsil/NheI            | -                 | 104                    | 9                   | 113                | -                                            | 3                                           |
| <i>ilvX</i>      | pXG-10sf | MMO-0867 x MMO-0868           | Nsil/NheI            | -                 | 29                     | 48                  | 77                 | -                                            | 16                                          |
| <i>ilvED</i>     | pXG-30sf | MMO-0890 x MMO-0870           | Nsil/NheI            | 45                | 64                     | 51                  | 160                | 15                                           | 17                                          |
| <i>ilvGM</i>     | pXG-30sf | MMO-0871 x MMO-0872           | Nsil/NheI            | 96                | -4                     | 69                  | 161                | 32                                           | 23                                          |
| <i>sucBC</i>     | pXG-30sf | MMO-0327 x MMO-0328           | Nsil/NheI            | 48                | 274                    | 30                  | 352                | 16                                           | 10                                          |
| <i>hisJQ</i>     | pXG-30sf | MMO-0477 x MMO-0478           | Nsil/NheI            | 30                | 89                     | 30                  | 149                | 10                                           | 10                                          |
| <i>yggX-mltC</i> | pXG-30sf | MMO-0798 x MMO-0799           | Nsil/NheI            | 120               | 64                     | 120                 | 304                | 40                                           | 40                                          |
| <i>rbsBK</i>     | pXG-30sf | MMO-0800 x MMO-0801           | Nsil/NheI            | 60                | 125                    | 60                  | 245                | 20                                           | 20                                          |
| <i>prmB-aroC</i> | pXG-30sf | MMO-0803 x MMO-0804           | Nsil/NheI            | 120               | 34                     | 90                  | 244                | 40                                           | 30                                          |

**Table S8. Inserts of GFP fusion plasmids.**

*E. coli* gene sequences are indicated in which black letters correspond to 5'UTR parts and red letters to ORF parts for pXG-10sf derivatives. For the intraoperonic fusions in pXG30-sf, upstream ORF fused with FLAG, intergenic region, downstream ORF fused with GFP are indicated in blue, black, and red, respectively. The overlapping region between ORFs is highlighted in magenta. NsiI and NheI sites used for cloning are highlighted in cyan and green, respectively.

| GFP fusion                                    | Insert                                                                                                                                                                                                                                                                                                                                                                    |
|-----------------------------------------------|---------------------------------------------------------------------------------------------------------------------------------------------------------------------------------------------------------------------------------------------------------------------------------------------------------------------------------------------------------------------------|
| <i>gdhA::gfp</i>                              | ATGCATgcaaaagcacatgacataaaaacaataagcacaatcgtattaatataaagggttttatatctatggatcagac<br>atattctctggagtcattctcCTAGC                                                                                                                                                                                                                                                             |
| <i>map::gfp</i>                               | ATGCATacttacatataattgttcggtatcaccgacgctgatggacagaattaatggctatctcaatcaagaccccagaa<br>gatatcgaaaaaatgcgctcCTAGC                                                                                                                                                                                                                                                             |
| <i>csfA::gfp</i>                              | ATGCATaatgtaacatctctatggacacgcacacggataacaactatgaacaaatcagggaatcctcgtctggacagt<br>gctctctgtaaatgggagcatttggctgggatacatttgaatcgtggggaacagatcCTAGC                                                                                                                                                                                                                          |
| <i>ydeE::gfp</i>                              | ATGCATatttttgcctgctatttcttaccatctctaaaacaaaacataaacgaaacgcaactgcccggacagacaaatgaac<br>ttatccctacgacgctctaccagcgcccttcttgcctcgtcgttatttaaacCTAGC                                                                                                                                                                                                                           |
| <i>rmf::gfp</i>                               | ATGCATcacaaatgatgacagtgccgtgaattttgcgcatgacggcagttatgattcgggtagacataatggcagtgattg<br>cacatttagtaatacactgtttctttccaccagaaccagatgagggaaacgaggtcgaagagacaaaaacgagatc<br>gctcggaaacgggacacatcaactggttatcaggccggcatcgccggacgctcaaaagaaatgtctccatcagacgctg<br>aatcaagggtcacaatggctgggagctggcgagaagccatggcggacaggttagtaatggccCTAGC                                               |
| <i>kgtP::gfp</i>                              | ATGCATctttacaaaaaaataaaacaaacgcgaccgacaaaaacatcggattacggcaggagacataatggcagtgctga<br>aagtactgtaacggcagacagcaaacgacaagttagtgatactcgtcgcgcattttggggcatttggggggcctctcag<br>gtaactcggctcgaagtgttctcgtatttctatgctcCTAGC                                                                                                                                                         |
| <i>icd::gfp</i>                               | ATGCATataacgcgcatctttcctgacggcacaacaatagggtagattgacaagccaattacaatcattaacaaaaat<br>tgctctaaagcatccgtatcgcaggacgcaaacgcatatgcaactggtggcagacgagcaaacagtagcgtcgaagg<br>agaggtgaatggaagttaaagttagttctcggcacaCTAGC                                                                                                                                                              |
| <i>gltP::gfp</i>                              | ATGCATaaaaaatctacaaccaacgcaacacaattcattgcctggcagtagtgcactttctcggtttctgaacgggg<br>aacggcgtctcattgaggaagtcatatgaaaaatataaaatcagcctggcctggcagattctggttgcctatggtg<br>ctgggcattctcctgggaaagttagtctcctaccatagcCTAGC                                                                                                                                                             |
| <i>aroP::gfp</i>                              | ATGCATaacttctttgatgtaacaaatataacaacaaacggattgcaaaccttacacagcgcactcctgctagatcaa<br>aaaaacaaccacgcaaggtttcctgatggaaggtcaaacgacggcgagcagctaaagcggccttaaaaaccgcc<br>atattCTAGC                                                                                                                                                                                                |
| <i>trpE::gfp</i>                              | ATGCATagcgggcttttttgaacaaaattagagaataacaatgcaaacacaaaaacgactctcgaactgctaacctg<br>cgaagggccttctcgcgacaatcccaccgcgcttttaccagttgtgtggCTAGC                                                                                                                                                                                                                                   |
| <i>acs::gfp</i>                               | ATGCATcctacaaggagaacaaaagcctagagcaaatcacaacaacaccattctcgaacatcgcagaccgttgctg<br>ataaacctcagcagtagcagggcagtagtatcaaaaCTAGC                                                                                                                                                                                                                                                 |
| <i>asd::gfp</i>                               | ATGCATatgtgccaagaggagaccgacacatttatacagcacacatctttgcaggaaaaaacgcttatgaaaaatggtg<br>gttttatcggctggcgcggtatggctcggctcctcatgcaacgcCTAGC                                                                                                                                                                                                                                      |
| <i>aspC::gfp</i>                              | ATGCATgacttccctctctgtaaccat aatggaacctcgtcatgtttgagaacattaccgcccgtcctcgcgaccgattc<br>tgggcctggccgatctgttctgctgcccagtagcagctcccggcaaaataacCTAGC                                                                                                                                                                                                                            |
| <i>purU::gfp</i>                              | ATGCATacacgtccgagtttggctgcaacgctcctcgccttgggttcaggttaaaaaatataaaagtctcggcca<br>ataatggttgacggtacggtttagcaaacactctcaacaaggttttccagcaatgactcactcacaacgtaaaagtctg<br>cgtactatttgcgggcaaaaaaggtctgatcCTAGC                                                                                                                                                                    |
| <i>ivbL::gfp</i>                              | ATGCATaaatattgttaaacacaaaacaaacaaaggtccccaatgactacttccatgctcaacgcgaaaaacta                                                                                                                                                                                                                                                                                                |
| <i>ivbB::gfp</i>                              | ATGCATttttctgttaagcacctcccgaaagtccggccagaagaaaggactggagcattggcaagttcgggcacaaca<br>tcgacgcgtaagcgtttaccggcgagaaatttatcgttCTAGC                                                                                                                                                                                                                                             |
| <i>ivbL::gfp</i>                              | ATGCATattaacgcgcatcaaaaatcggccaaaaatacttctgactatttacaacacatggtaactcttttagcat<br>tccttcgacaagaatgcaagaaaagacaaaatgacagccCTAGC                                                                                                                                                                                                                                              |
| <i>ivbX::gfp</i>                              | ATGCATaccttaaaaacataaacggaggcagacaatgaaataacagcacaacaaatctctgttctcaagattcaggacgggg<br>aacCTAGC                                                                                                                                                                                                                                                                            |
| <i>ivbD::gfp</i>                              | ATGCATgaaaccgaaagataaatgggctggttagatcaagttaatacaaaatcaaaaaatgggacggcagcaccgctc<br>ccatttacgagacagacactgggagtaataaaagtatgcctaagtaccgttccgccaccaccactcattggtcgttaatatg<br>gcggtCTAGC                                                                                                                                                                                        |
| <i>ivbM::gfp</i>                              | ATGCATtacctgcttcatgctcctcaatcgacgaacttgagaacgtctggccgctggtgcccctggcgcagtaattcaga<br>aatggtggagaattatcctgctgcaacatcaggtcaatgtagctcgtctcaatccagaacacttagaacgtgtttt<br>acgcgtgCTAGC                                                                                                                                                                                          |
| <i>P<sub>LtetO</sub>-FLAG::sucB-sucC::gfp</i> | ATGCATatcaaaagagttgctggaagatccgacgcgtctgctgtagctgtagttagtttaagtttacctgactgtag<br>accgataagcattatgcctctcctcgcaattgaagcctgatgacgctgacgcgtcttaccaggcctacgggacca<br>ccaatgtaggtcggataaaggcgaagcggcctcggacaaagcagatgctgtagctttaacgtgtcttaccaggcc<br>tacgggtgaccgacaatcccgggaagcagatacgaatattcgtctacggtttaaaagataaacgattactgaaggatgga<br>cagaacacatgaacttacctgaatcaggcaaaaCTAGC |
| <i>P<sub>LtetO</sub>-FLAG::hisJ-hisQ::gfp</i> | ATGCATtacttcgattttgatgtttatgggtggctaaatcgccatcgtgaaagaaagcccctcctcctgggtaaccggag<br>ggagacaagaggcgttaattcaaccacacagcaggaagcagcattggtgtaggggtttcagggttatcttaCTAGC                                                                                                                                                                                                          |
| <i>P<sub>LtetO</sub>-FLAG::yggX-mltC::gfp</i> | ATGCATaagaaactcaacatgatgaatgcccagcaccgcaagctgcttgagcaggagatggtcaacttctcgttcgaggg<br>taaagaggtgcatatcgagggtatcgcgggaagataaaaaataaaacagtgcccggagcagcctcggcaacttgca<br>taaaaacaacacaacacgcccggaaatgtagaaaaatctcgcgctggctttgattgcccgttgcctctcctcctg<br>ctcagcaccacaaaaggcagatacctataacgaagcctgggtcaaaagatacaacaggttttgatattctgCTAGC                                           |
| <i>P<sub>LtetO</sub>-FLAG::rbsB-rbsK::gfp</i> | ATGCATaaagggcagaaagttcaggctaaatctcgggttgatctgaaactggtttgtaaacgtagtttaaatcaggttg<br>tagacctgaggtgacataaaatcgtctcgcagatgaactgtaataaaagaaagcagggcagcgcaccctaa<br>cacggtggcagattttatggacatccgaaatgcaaacgcagggcagcctcgttcttggcagcattaatgctgacc<br>acattcttaactCTAGC                                                                                                            |
| <i>P<sub>LtetO</sub>-FLAG::prmB-aroC::gfp</i> | ATGCATcaatctcggatgttccgctcactcgtggagtttgataacggcggcagtggtggtttatgctcaccacaaaga<br>gcagcttatgcccagcagacaacttccgctttataaagattaaagtaaacacgcaaacacaacataaacggagccggtg<br>atggctggaacacaaatggacaactcttccggtaacaccctcggcgaaatcgacgggctggcgtcggctgcatcgt<br>cgatggtgttCTAGC                                                                                                      |
